# Supplementary material for: Reversing increased neuronal nitric oxide synthase in Alzheimer’s disease prevents aberrant glutamatergic calcium responses
Source: Research Square preprint supplement (doi:10.21203/rs.3.rs-2257266/v1), 2022-11-29
Supplement: Supplementary file 2 [file 85ac963d4d6c7d6e8c2946b8.pdf]

## Supplementary tables

**Supplementary Table 1. Human *post-mortem* tissue demographic and clinical indicines.** Demographic and clinical indices for human *post-mortem* tissue cohort used to assess relative expression and localisation of nNOS in the brain.

| Case | Status  | Age (y) | Sex | PMI  | Fixation (m) | <i>APOE</i> genotype | Braak Stage |
|------|---------|---------|-----|------|--------------|----------------------|-------------|
| 1    | Control | 93      | F   | 21   | 81           | $\epsilon 3/3$       | 0           |
| 2    | Control | 79      | M   | 8    | 49           | $\epsilon 2/3$       | 0           |
| 3    | Control | 82      | F   | 7.7  | 102          | $\epsilon 3/3$       | 2           |
| 4    | Control | 78      | F   | 11   | 78           | $\epsilon 3/3$       | 1           |
| 5    | Control | 69      | M   | 13.5 | 76           | $\epsilon 3/3$       | 0           |
| 6    | Control | 73      | M   | 48   | 67           | $\epsilon 3/3$       | 2           |
| 7    | Control | 73      | M   | 51   | 66           | $\epsilon 3/3$       | 1           |
| 8    | Control | 78      | F   | 45   | 58           | $\epsilon 3/4$       | 1           |
| 9    | Control | 63      | F   | 42   | 41           | $\epsilon 3/4$       | 0           |
| 10   | Control | 87      | F   | 5    | 34           | $\epsilon 3/4$       | 0           |
| 11   | Control | 85      | F   | 10   | 34           | $\epsilon 3/3$       | 2           |
| 12   | Control | 63      | F   | 50   | 26           | $\epsilon 3/3$       | 0           |
| 13   | Control | 64      | M   | 17   | 17           | $\epsilon 3/3$       | 0           |
| 14   | Control | 58      | M   | 39   | 139          | $\epsilon 3/3$       | 0           |
| 15   | Control | 80      | M   | 12   | 9            | $\epsilon 3/3$       | 1           |
| 16   | Control | 67      | M   | 29   | 6            | $\epsilon 3/3$       | 1           |
| 17   | Control | 84      | F   | 6    | 26           | $\epsilon 3/4$       | N.A.        |
| 18   | LOAD    | 74      | M   | 5    | 79           | $\epsilon 4/4$       | 6           |
| 19   | LOAD    | 85      | F   | 23   | 73           | $\epsilon 3/3$       | 0           |
| 20   | LOAD    | 83      | M   | 25   | 70           | $\epsilon 4/4$       | 6           |
| 21   | LOAD    | 94      | F   | 7    | 68           | $\epsilon 3/3$       | 5           |
| 22   | LOAD    | 84      | F   | 6    | 64           | $\epsilon 3/4$       | 6           |
| 23   | LOAD    | 83      | F   | 3    | 61           | $\epsilon 3/4$       | 5           |
| 24   | LOAD    | 60      | F   | 12   | 59           | $\epsilon 3/4$       | 6           |
| 25   | LOAD    | 68      | M   | 23   | 54           | $\epsilon 3/4$       | 6           |
| 26   | LOAD    | 69      | M   | 3    | 46           | $\epsilon 3/3$       | 6           |

| Case | Status | Age (y) | Sex | PMI  | Fixation (m) | <i>APOE</i> genotype | Braak Stage |
|------|--------|---------|-----|------|--------------|----------------------|-------------|
| 27   | LOAD   | 100     | F   | 4    | 41           | $\epsilon 3/4$       | N.A.        |
| 28   | LOAD   | 76      | F   | 3    | 35           | $\epsilon 3/4$       | 4           |
| 29   | LOAD   | 97      | F   | 16   | 35           | $\epsilon 2/3$       | N.A.        |
| 30   | LOAD   | 100     | F   | 3    | 32           | $\epsilon 3/3$       | 5           |
| 31   | LOAD   | 80      | F   | 32   | 25           | $\epsilon 3/4$       | 6           |
| 32   | LOAD   | 86      | M   | 9    | 24           | $\epsilon 3/4$       | 6           |
| 33   | LOAD   | 65      | F   | 21.5 | 27           | $\epsilon 3/3$       | 6           |
| 34   | LOAD   | 58      | M   | 12   | 19           | $\epsilon 3/3$       | 6           |
| 35   | LOAD   | 98      | F   | 11   | 18           | $\epsilon 3/3$       | 5           |
| 36   | LOAD   | 85      | F   | 10   | 15           | $\epsilon 3/3$       | 6           |
| 37   | LOAD   | 67      | M   | 9    | 14           | $\epsilon 3/3$       | 6           |
| 38   | LOAD   | 77      | M   | 26   | 12           | $\epsilon 4/4$       | 6           |
| 39   | LOAD   | 66      | M   | 9    | 11           | $\epsilon 4/4$       | 5           |
| 40   | LOAD   | 72      | F   | 13   | 10           | $\epsilon 3/3$       | N.A.        |
| 41   | LOAD   | 78      | F   | 6    | 88           | $\epsilon 4/4$       | 4           |
| 42   | LOAD   | 74      | M   | 19   | 77           | $\epsilon 3/4$       | 6           |
| 43   | LOAD   | 85      | F   | 16   | 67           | $\epsilon 3/3$       | 4           |
| 44   | LOAD   | 74      | F   | 16.5 | 64           | $\epsilon 3/4$       | 5           |

Abbreviations: Control - cognitively healthy donor; F - female; LOAD – Late onset Alzheimer’s disease donor; M - male; m - months; N.A. - not available; PMI - *Post-mortem* interval; y - years.

**Supplementary Table 2.** Induced pluripotent stem cell (iPSC) line details used in thesis.

| iPSC line        | Sex    | Age | Mutation                      | APOE genotype  | DOI                                                                                             |
|------------------|--------|-----|-------------------------------|----------------|-------------------------------------------------------------------------------------------------|
| <b>Control 1</b> | Female | 56  | N.A.                          | $\epsilon$ 2/4 | <a href="https://dx.doi.org/10.1016/j.scr.2018.09.014">dx.doi.org/10.1016/j.scr.2018.09.014</a> |
| <b>Control 2</b> | Male   | 57  | N.A.                          | $\epsilon$ 3/3 | <a href="https://doi.org/10.1038/srep31450">10.1038/srep31450</a>                               |
| <b>Control 3</b> | Female | 75  | N.A.                          | $\epsilon$ 2/3 | <a href="https://doi.org/10.1016/j.scr.2018.08.006">doi.org/10.1016/j.scr.2018.08.006</a>       |
| <b>LOAD 1</b>    | Female | 83  | N.A.                          | $\epsilon$ 4/4 | <a href="https://doi.org/10.3390/cells9092018">10.3390/cells9092018</a>                         |
| <b>LOAD 2</b>    | Male   | 65  | N.A.                          | $\epsilon$ 3/4 | <a href="https://doi.org/10.1038/srep31450">10.1038/srep31450</a>                               |
| <b>LOAD 3</b>    | Male   | 83  | N.A.                          | $\epsilon$ 4/4 | <a href="https://doi.org/10.1007/s00702-012-0839-2">10.1007/s00702-012-0839-2</a>               |
| <b>fAD</b>       | Female | 56  | <i>PSEN1</i> <sup>A246E</sup> | $\epsilon$ 3/4 | <a href="https://doi.org/10.1016/j.scr.2018.08.006">doi.org/10.1016/j.scr.2018.08.006</a>       |

Abbreviations: Control - cognitively healthy (donor); fAD - familial Alzheimer's disease (donor); LOAD – late-onset Alzheimer's disease (donor); N.A. – Not applicable.

**Supplementary Table 3.** Primary antibodies and their dilutions used for immunocytochemistry.

| Primary antibody   | Raised in   | Dilution | Company Cat #     |
|--------------------|-------------|----------|-------------------|
| <b>Anti-nNOS</b>   | Rabbit pAB  | 1:100    | Abcam #ab5586     |
| <b>Anti-PSD-95</b> | Mouse mAb   | 1:500    | Merck #CP35       |
| <b>Anti-MAP2</b>   | Chicken pAB | 1:100    | Covance #PKC-554P |
| <b>Anti-NMDAR1</b> | Mouse mAb   | 1:100    | Abcam #ab134308   |

Abbreviations: mAB - monoclonal antibody; pAB – polyclonal antibody.

**Supplementary Table 4.** Secondary antibodies and their dilutions used for immunocytochemistry.

| Secondary antibody                                 | Raised in | Dilution | Company Cat #              |
|----------------------------------------------------|-----------|----------|----------------------------|
| <b>Goat anti-mouse IgG (H+L) Alexa Fluor 488</b>   | Goat      | 1:1000   | Life Technologies #A-11001 |
| <b>Goat anti-rabbit IgG (H+L) Alexa Fluor 488</b>  | Goat      | 1:1000   | Life Technologies #A-11008 |
| <b>Goat anti-chicken IgY (H+L) Alexa Fluor 647</b> | Goat      | 1:1000   | Life Technologies #A-21449 |

Abbreviations: IgG (H + L) - Immunoglobulin G (Heavy + Light) chain.

**Supplementary Table 5.** Primary antibodies and their dilutions used for western blotting.

| Primary antibody         | Raised in  | Dilution | Sample                 | Company Cat #   |
|--------------------------|------------|----------|------------------------|-----------------|
| <b>Anti-nNOS</b>         | Rabbit pAB | 1:5000   | Cell and tissue lysate | Abcam #ab5586   |
| <b>Anti-Tau 13 B11E8</b> | Mouse mAb  | 1:5000   | Cell lysate            | Abcam #ab19030  |
| <b>Anti-Tau s404</b>     | Rabbit mAB | 1:1500   | Cell lysate            | Abcam #ab92676  |
| <b>Anti-Tau s214</b>     | Rabbit mAB | 1:5000   | Cell lysate            | Abcam #ab170892 |

Abbreviations: mAB - monoclonal antibody; pAB – polyclonal antibody.

**Supplementary Table 6.** Secondary antibodies and their dilutions used for western blotting.

| <b>Secondary antibody</b>             | <b>Raised in</b> | <b>Dilution</b> | <b>Company Cat #</b>    |
|---------------------------------------|------------------|-----------------|-------------------------|
| <b>Goat anti-rabbit IgG (H+L) HRP</b> | Goat             | 1:5000          | Merck Millipore #AP307P |
| <b>Goat anti-mouse IgG (H+L) HRP</b>  | Goat             | 1:5000          | Merck Millipore #A308P  |

Abbreviations: IgG (H + L) HRP - Immunoglobulin G (Heavy + Light) chain Horse Radish Peroxidase.
